# Supplementary material
Source: Springer Nature journal article supplement (https://www.springermedizin.de/resource/supplementary/12967_2011_712_MOESM2_ESM.pdf/9577362)

## Body Weight Changes Curve

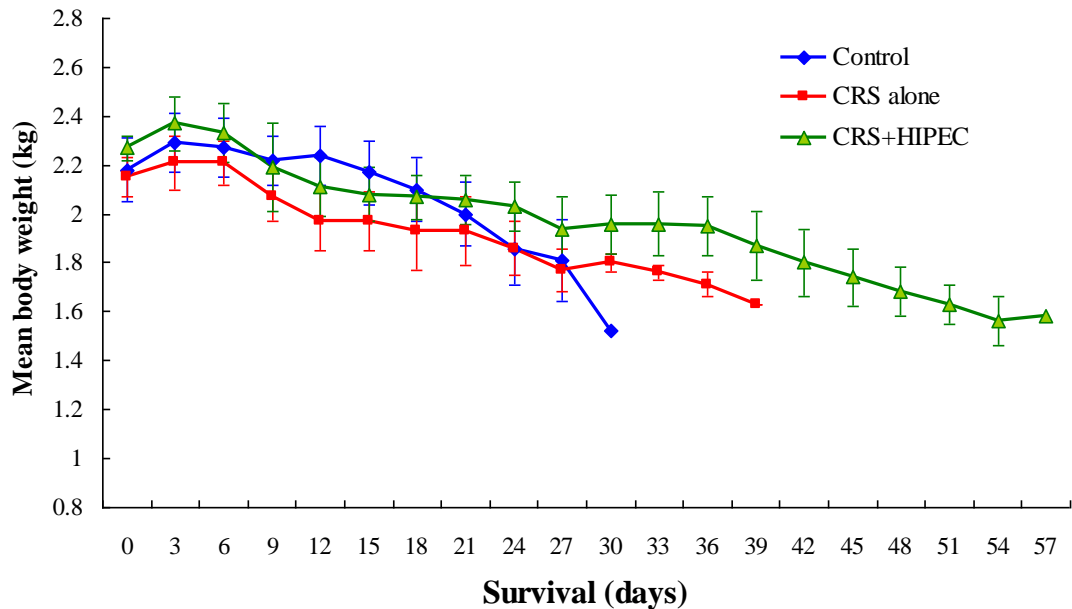

Supplement: MOESM2 [file 9577362]
